# Supplementary material for: Detection of Methylphenidate in Equine Hair Using Liquid Chromatography–High-Resolution Mass Spectrometry
Source: MDPI journal article supplement (doi:10.3390/molecules26195798), 2021-09-24

Supplementary Materials

# Detection of Methylphenidate in Equine Hair Using Liquid Chromatography–High-Resolution Mass Spectrometry

Benjamin C. Moeller 1,2,\* , Luis Flores 1, Amel Clifford 1, Gwendolyne Alarcio 1, Mary Mosburg 1 and Rick M. Arthur 3

1 KL Maddy Equine Analytical Chemistry Laboratory, School of Veterinary Medicine, University of California, Davis, Davis, 95616 CA, USA; laflore@ucdavis.edu (L.F.); amlclifford@ucdavis.edu (A.C.); gsgonzales@ucdavis.edu (G.A.); mmmosburg@ucdavis.edu (M.M.)

2 Department of Molecular Biosciences, School of Veterinary Medicine, University of California, Davis, Davis, 95616 CA, USA

3 School of Veterinary Medicine, University of California, Davis, Davis, 95616 CA, USA; rmarthur@ucdavis.edu

\* Correspondence: bcmoeller@ucdavis.edu; Tel.: +1-530-752-8700

| Table of Contents                                                                                                                         | Page |
|-------------------------------------------------------------------------------------------------------------------------------------------|------|
| <b>Figure S1.</b> Representative calibration curve of methylphenidate spiked in hair using linear regression analysis with 1/x weighting. | 2    |

**Figure S1.** Representative calibration curve of methylphenidate spiked in hair using linear regression analysis with 1/x weighting.

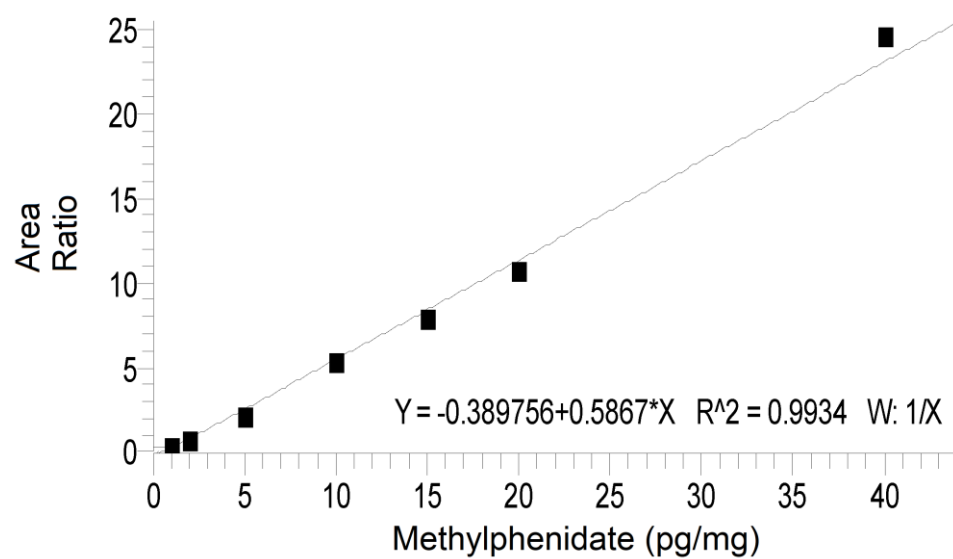

Supplement: s1 [file s1]
